# Supplementary material for: A 3-D net based on weak metallophilic (Cu⋯Cu) interactions
Source: Royal Society of Chemistry journal article supplement (doi:10.1039/c6dt00883f), 2016-01-01
Supplement: c6dt00883f1.pdf [file c6dt00883f1.pdf]

## Supporting Information

### An uncommon 3-D topological net based on weak metallophilic (Cu $\cdots$ Cu) interactions

Jian Zhou, Xiaofeng Tan, Feilong Hu, Hua-Hong Zou, Lianshe Fu, and Rongqing Zhao

**General Remarks.** All analytical grade chemicals were obtained commercially and used without further purification. IR spectra were obtained from a powdered sample pelletized with KBr on an ABB Bomen MB 102 series IR spectrophotometer in the range of 400–4000 $\text{cm}^{-1}$ . Room-temperature optical diffuse reflectance spectra of the powdered samples were obtained with a Shimadzu UV-3150 spectrometer. The absorption data were calculated from reflectance spectra by using the Kubelka–Munk function:  $a/S = (1-R^2)/2R$ , where  $a$  is the absorption coefficient,  $S$  is the scattering coefficient, and  $R$  is the reflectance. Fluorescence spectral analyses were performed using a Cary Eclips fluorescence spectrometer. PXRD patterns were obtained using a Bruker D8 Advance XRD diffractometer with Cu  $K\alpha$  radiation ( $\lambda = 1.54056 \text{ \AA}$ ).

**Computational descriptions.** The density of states (DOS) of **1** was theoretically calculated by using the computer code CASTEP. The total energy is calculated with the density functional theory (DFT) using the Perdew–Burke–Ernzerh of generalized gradient approximation (GGA) [J. P. Perdew, K. Burke and M. Ernzerhof, *Phys. Rev. Lett.*, 1996, **77**, 3865]. The following orbital electrons are treated as valence electrons: H  $1s^1$ , N  $2s^2 2p^3$ , C  $2s^2 2p^2$ , O  $2s^2 2p^4$  and Cu  $3d^{10} 4s^1$ . The number of plane waves included in the basis is determined by a cutoff energy of 340 eV, and the numerical integration of the Brillouin zone is performed using a Monkhorst-Pack  $k$  point sampling:  $4 \times 4 \times 4$  for **1**. The Fermi level ( $E_f = 0 \text{ eV}$ ) was selected as the reference of the energy.

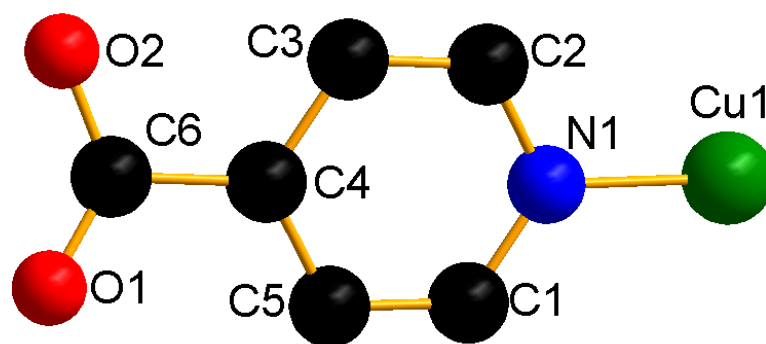

Fig. S1 The asymmetric unit of **1** (H atoms bonded to C atoms have been omitted for clarity).

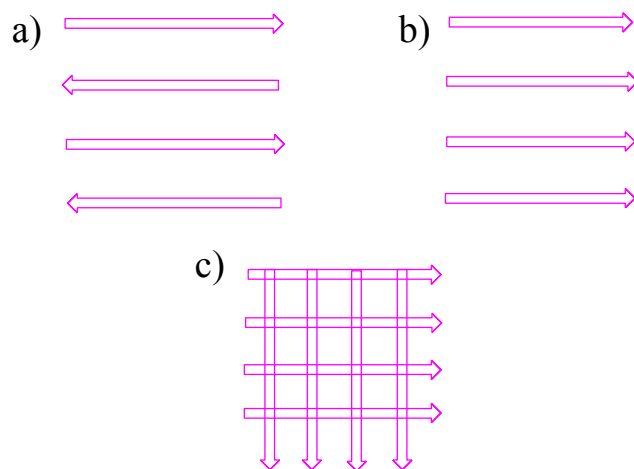

Scheme S1. Stacking Modes of 1-D chains {(a) type I, (b) type II, (c) type III}.

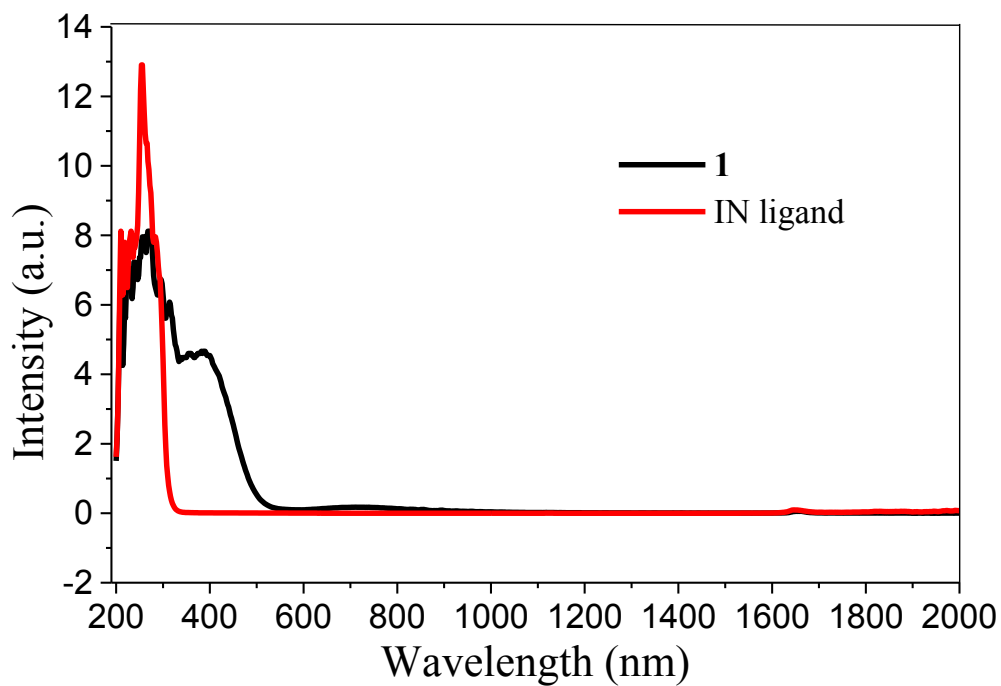

Fig. S2 UV-vis absorption spectra of the free IN ligand and **1**.

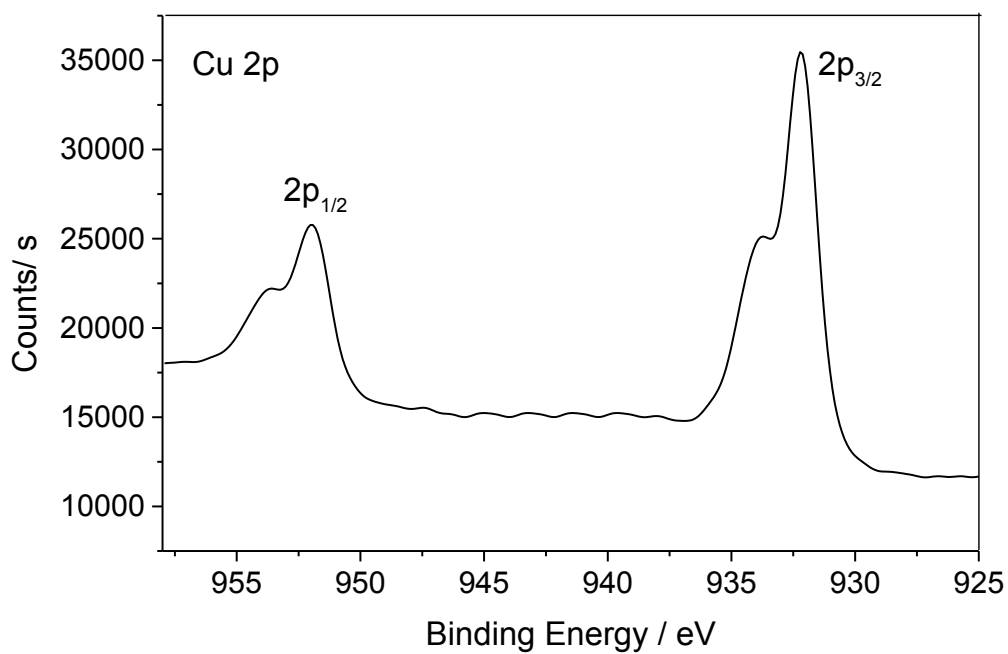

Fig. S3 Cu 2p XPS spectrum of **1**.

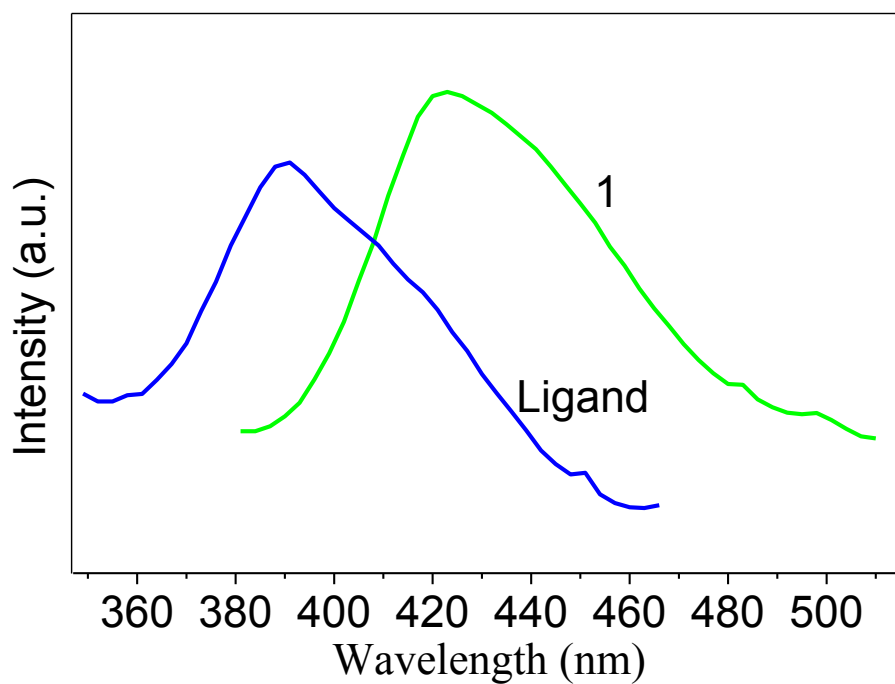

Fig. S4 The solid-state photoluminescent spectra of **1** and ligand at room temperature.

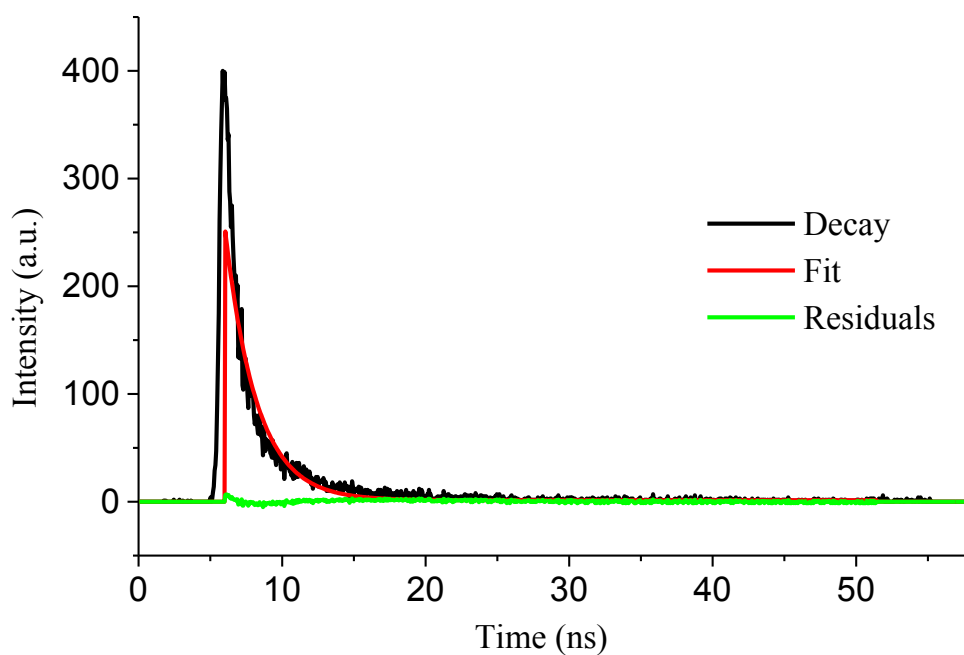

Fig. S5 Decay life time curve of **1**.

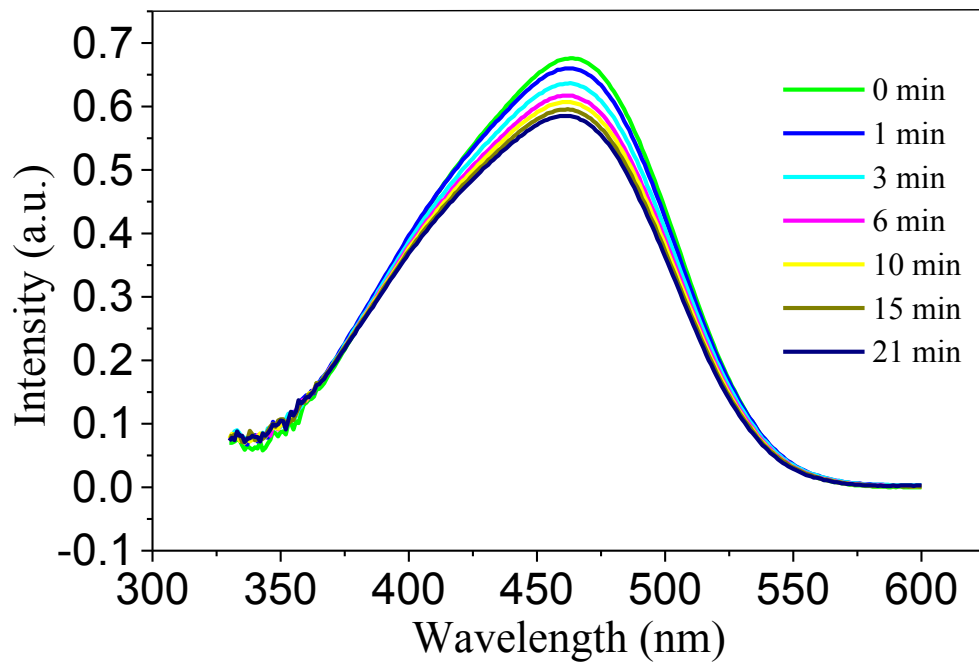

Fig. S6 UV-vis absorption spectra for degradation of methyl orange by using **1** as photocatalyst.

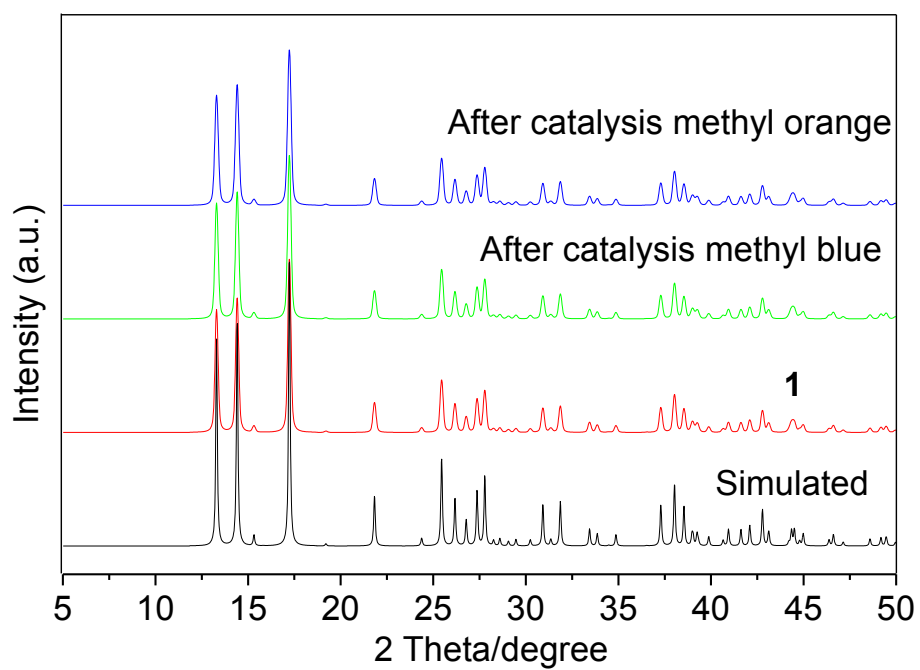

Fig. S7 Simulated, experimental and after catalysis of methyl blue or methyl orange powder XRD patterns of **1**.
